# Supplementary material for: Laplace inverted pulsed EPR relaxation to study contact between active material and carbon black in Li–organic battery cathodes
Source: Royal Society of Chemistry journal article supplement (doi:10.1039/d3cp00378g), 2023-01-01
Supplement: d3cp00378g1.pdf [file d3cp00378g1.pdf]

## *Supplementary information*

# Laplace inverted pulsed EPR relaxation to study contact between active material and carbon black in Li-organic battery cathodes

Davis Thomas Daniel<sup>1,2,\*</sup>, Conrad Szczuka<sup>1</sup>, Peter Jakes<sup>1</sup>,  
Rüdiger-A. Eichel<sup>1,3</sup>, Josef Granwehr<sup>1,2</sup>

<sup>1</sup>Institute of Energy and Climate Research (IEK-9),  
Forschungszentrum Jülich, Jülich 52425, Germany

<sup>2</sup>Institute of Technical and Macromolecular Chemistry,  
RWTH Aachen University, Aachen 52056, Germany

<sup>3</sup>Institute of Physical Chemistry,  
RWTH Aachen University, Aachen 52056, Germany

*\*Correspondence to: d.daniel@fz-juelich.de*

# 1 Laplace inversion

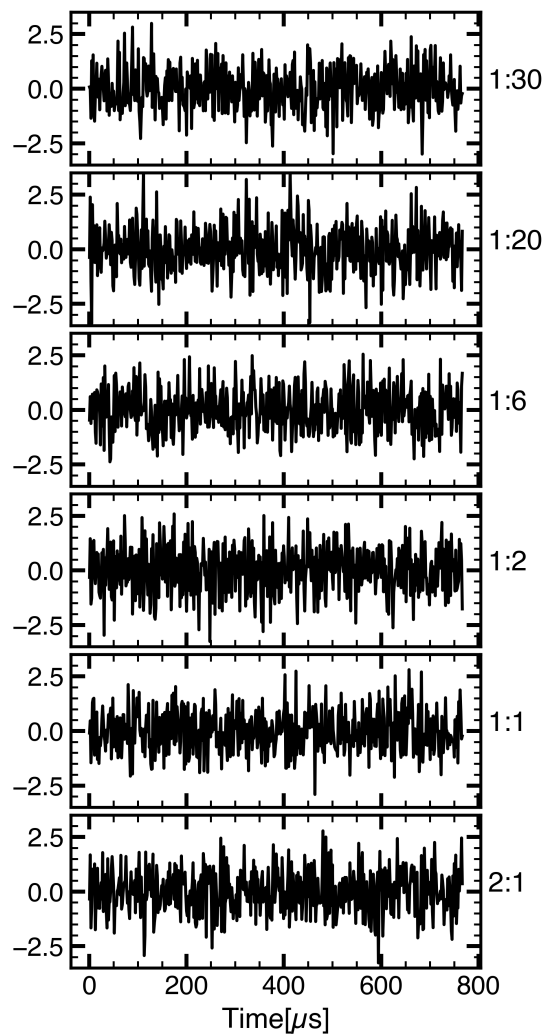

**Figure S1:** Residuals from inverse Laplace transform (ILT) fits of  $T_1$  data using an exponential kernel. The corresponding distributions are shown in Figure 5 of the main text. Ratios on the right edge denote the PTMA monomer to Super P weight ratio. The residuals were representative of random noise and did not show any apparent systematic features.

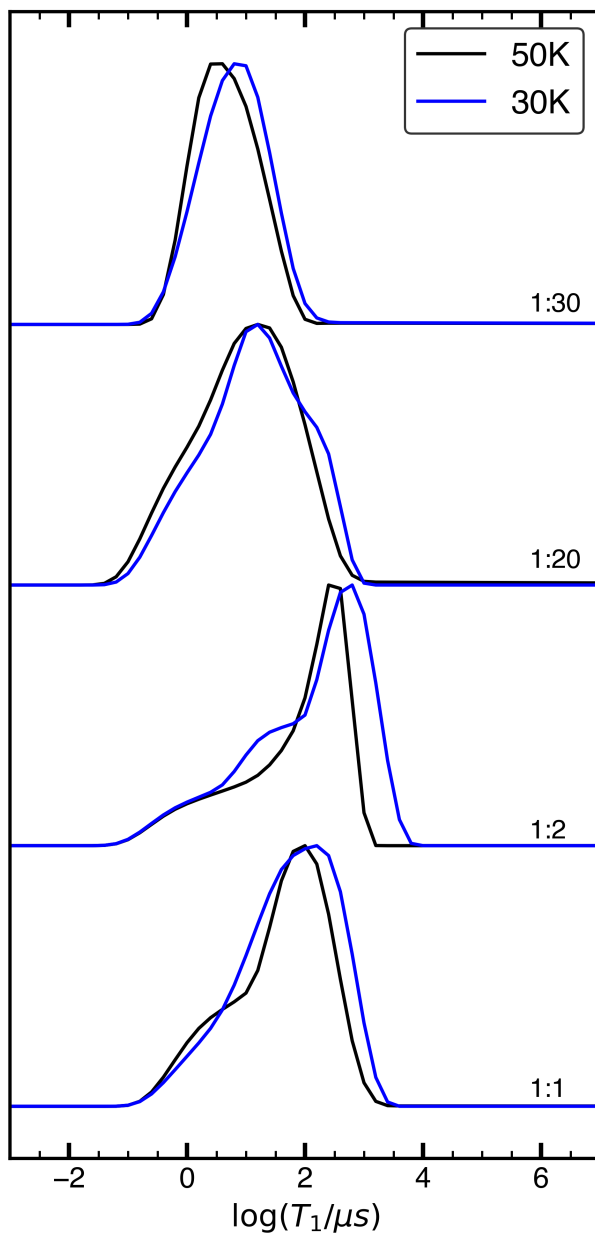

**Figure S2:** Comparison of relaxation time distributions at 30 K (blue) and 50 K (black), obtained using ILT for composite samples. Ratios on the right edge denote the PTMA monomer to Super P weight ratio. The  $T_1$  distribution at 30 K shows more resolved components, and a shift of the slower relaxing component.

## 2 $T_1$ anisotropy

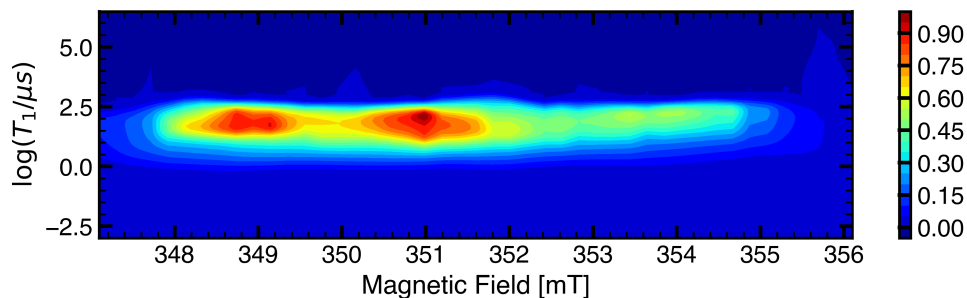

**Figure S3:** Dependence of ILT-derived  $T_1$  distributions on magnetic field position. The inversion recovery experiments were conducted by sampling 45 field points of the field-swept echo detected spectrum of a 2:1 composite sample.  $T_1$  measurements at various field positions were done at 50 K using the same experimental parameters as described in the Experimental section of the main text. The broad negative component at long  $T_1$  values arises due to a fit of the baseline, since the signal reaches an equilibrium value that is non-zero for recovery delays towards infinity.

### 3 Non-negativity constraint

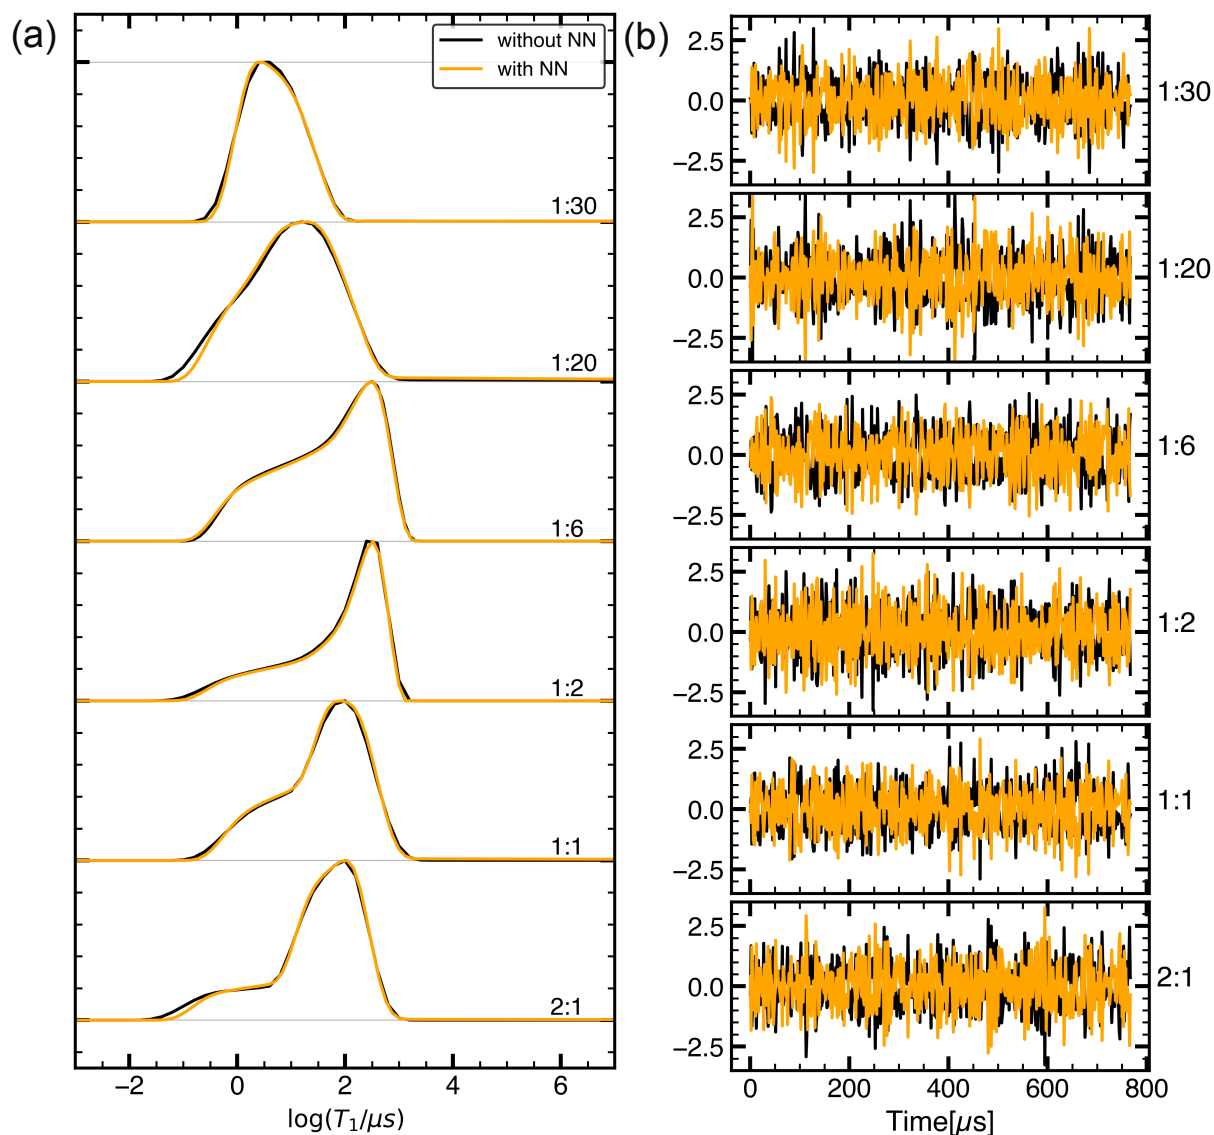

**Figure S4:** (a) Comparison of  $T_1$  distributions obtained using ILT with (black) and without (orange) non-negativity penalty. The use of a non-negativity penalty did not show significant differences in the obtained  $T_1$  distributions. (b) Residuals from ILT fits of  $T_1$  data using an exponential kernel with (black) and without (orange) non-negativity penalty. The two sets of residuals are shown with opposite sign for better visibility.

## 4 Laplace inversion of $T_m$

Figure S5a shows  $T_m$  curves for some of the composite samples. Laplace inversion of  $T_m$  data in the presence of oscillations on the spin echo decay curve due to electron spin echo envelope modulation (ESEEM) leads to fits as shown in Figure S5b, where the 2:1 sample is shown as an example. Oscillations at short echo times, which are not inconsistent with inversion using an exponential kernel, are overfitted. This can be circumvented by employing a weighted Laplace inversion, using a guess of the non-uniform amplitude of the ESEEM oscillations as a noise estimate, thereby treating ESEEM modulations as noise on the relaxation curve (Figure S5c). Then distribution as shown in Figure S5d are obtained. While the  $T_m$  distributions also show multiple components, similar to  $T_1$ , in the presence of ESEEM an accurate quantification of the relative contributions of relaxation components is not feasible.

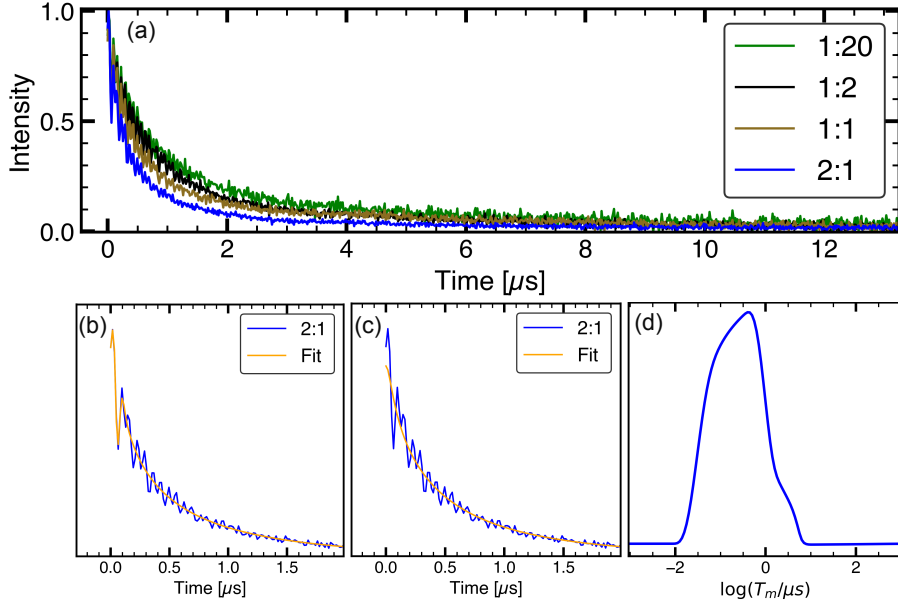

**Figure S5:** (a) Comparison of spin echo decay time traces for varying ratios of PTMA monomer to Super P, acquired at 50 K. The 2:1 composite sample shows the fastest  $T_m$  rate, owing to the highest amount of nitroxide spins and small inter-spin distances. For better comparison of spin echo decay curves from different composite samples, the data was scaled between 0 and 1. (b) Fit of  $T_m$  curve for the 2:1 sample using ILT in the presence of ESEEM oscillations. (c) Fit of  $T_m$  curve for 2:1 obtained using weighted ILT with the amplitude of ESEEM oscillations treated as a noise estimate. (d)  $T_m$  distribution obtained using ILT with the fitting approach shown in (c).
